# Supplementary material for: Isotopic Niche Variation in a Higher Trophic Level Ectotherm: Highlighting the Role of Succulent Plants in Desert Food Webs
Source: PLoS One. 2015 May 14;10(5):e0126814. doi: 10.1371/journal.pone.0126814 (PMC4431868; doi:10.1371/journal.pone.0126814)
Supplement: S2 Table — The identification label corresponds to each population. (XLS) [file pone.0126814.s004.xls]

## Sheet: Hoja1
MUESTRA	d15N ‰ (Air-N2)	d13C ‰ (V-PDB)
CNAR26	10.7955
CNAR27	10.483	-27.7374
CNAR28	9.9472	-26.3808
CNAR29	11.3457	-27.291
CNAR30	10.5455	-27.1729
CNAR31	11.0092	-28.4872
CNAR32	10.7581	-28.6692
CNAR33	11.7421	-26.1295
CNAR34	11.4825	-22.0815
CNAR35	10.0914	-26.1403
CNAR36	10.9547	-27.6182
CNAR37	11.7475	-27.7146
CNAR38	9.73939	-28.2802
CNAR39	10.4819	-26.2373
CNAR40	10.0562	-24.631
CNAR41	10.4152	-21.9309
CNAR42	10.85	-20.1513
CNAR43	11.2723	-20.5901
CNAR44	10.0946	-21.3447
CNAR45	10.7987	-20.6242
KM83-1	13.178	-19.012
KM83-2	11.4654	-17.9209
KM83-3	13.0862	-17.8125
KM83-4	13.0092	-17.8396
KM83-5	13.3383	-19.2547
KM83-6	13.1059	-17.9366
KM83-7	12.9227	-17.4669
KM83-8	13.4035	-17.8223
KM83-9	13.021	-19.9535
KM83-10	13.7795	-16.6954
KM83-11	13.0103	-18.338
KM83-12	10.1032	-16.1916
KM83-13
KM83-14	12.2421	-22.6969
KM83-15	10.538	-17.5286
KM83-16	12.5776	-19.7596
KM83-17	12.3767	-17.0183
KM83-18	12.9206	-18.7389
KM83-19	12.8981	-16.2154
KM83-20	12.0669	-19.324
KM83-21	12.5723	-17.6511
CSL1	9.88341	-18.5694
CSL2
CSL3	9.28444	-18.7492
CSL4	9.22781	-20.9122
CSL5	10.2242	-18.2507
CSL6	8.41812	-17.8961
CSL7	10.362	-18.1639
CSL8	11.9405	-15.5479
CSL9	11.1426	-16.6511
CSL10	9.23648	-17.5321
CSL11
CSL12	9.63852	-17.8795
CSL13	11.6752	-16.488
CSL14	10.9242	-16.5146
CSL15
CSL16	10.8946	-16.239
CSL17	10.3691	-20.5462
CSL18	11.9528	-18.4582
CSL19	9.95382	-17.4866
INB22	12.7354	-16.7731
INB23
INB24	13.6359	-17.2789
INB25	15.0186	-17.6896
INB26	13.4941	-17.3532
INB27	14.4951	-17.9851
INB28	14.8676	-17.5746
INB29	13.8625	-18.329
INB30	14.8191	-17.8549
INB31	14.0349	-18.2646
INB32	13.3849	-17.9018
INB33	14.2691	-17.8206
INB34	13.5609	-18.4674
INB35	15.4446	-17.8418
INB36	15.5079	-17.5807
INB37	15.4568	-15.3814
INB38	13.3451	-17.9643
INB39	15.4232	-21.8904
INB41	13.09	-18.249
INB42	15.4951	-17.7549
MI6-1	12.7477	-22.4896
MI6-2	14.3497	-21.9857
MI6-3	9.03444	-21.649
MI6-4	13.7242	-21.5895
MI6-5	11.587	-22.3215
MI6-6	8.8773	-21.1346
MI6-7	10.4079	-23.3328
MI6-8	12.0375	-19.2248
MI6-9	9.99158	-21.7519
MI6-10	10.7436	-20.569
MI6-11	11.4824	-20.2848
MI6-12	11.8579	-19.9548
MI6-13	10.8661	-22.1549
MI6-14	9.4875	-22.6532
MI6-15
MI6-16	10.7365	-21.749
MI6-17	10.6844	-20.4314
MI6-18	11.9666	-17.3972
MI6-19	11.0612	-22.2318
MI6-20	10.4519	-21.5589
TECO1	8.82906	-20.4449
TECO2	9.30641	-18.8816
TECO3	6.56292
TECO4	6.52786
TECO5
TECO6	9.29197	-20.2306
TECO7	7.94446	-19.3366
TECO8	5.72059	-20.2646
TECO9	7.04543	-19.233
TECO10	5.82678	-19.2918
TECO11	8.51821	-19.5571
TECO12	7.52484	-18.691
TECO13	8.34345	-16.9113
TECO14
TECO15	9.36208	-16.5455
TECO16	6.4959	-16.764
TECO17	8.95123	-15.7587
TECO18	7.61866	-17.2957
TECO19	7.65114	-17.7759
BAR 1	7.15059	-21.7897
BAR 2	10.158	-19.976
BAR 3	8.97236	-21.6392
BAR 4	8.18571	-21.9937
BAR 5	8.71668	-21.5929
BAR 6	7.04543	-22.1916
BAR 7	7.11966	-22.3214
BAR 8	5.74637	-22.1535
BAR 9	7.77331	-21.7474
BAR 10	5.8938	-22.7635
BAR 11	5.71028	-22.1298
BAR 12	7.77744	-22.2369
BAR 13	8.5579	-22.4657
BAR 14	7.59082	-21.8608
BAR 15	8.76101	-21.8886
BAR 16	7.81043	-22.2452
BAR 17
BAR 18	8.61358	-21.3703
BAR 19	8.28366	-21.8969
BAR 20	8.8538	-21.7299
BAJ 1	8.30531	-21.7557
BAJ 2	12.2829	-21.6897
BAJ 3	14.0511	-20.7664
BAJ 4	13.3747	-18.591
BAJ 5	12.1767	-21.7784
BAJ 6	13.4397	-21.8268
BAJ 7	13.5469	-21.4187
BAJ 8	13.6191	-22.847
BAJ 9	12.8077	-21.7763
BAJ 10	11.2602	-21.9525
BAJ 11	15.1914	-20.906
BAJ 12	12.0365	-23.1881
BAJ 13	12.6654	-23.4379
BAJ 14	13.5026	-23.7847
BAJ 15	13.1438	-21.2435
BAJ 16	13.1319	-21.6021
BAJ 17	14.7702	-19.5355
BAJ 18	14.6748	-21.192
BAJ 19	14.0047	-21.3074
BAJ 20	14.6511	-19.9333
JHV 1	14.448	-17.4657
JHV 2	13.882	-18.929
JHV 3	13.5923	-17.8532
JHV 4	13.5644	-15.1976
JHV 5	12.2334	-14.4402
JHV 6	10.6075	-20.7314
JHV 7	11.0457	-16.5805
JHV 8
JHV 9	11.3777	-16.8268
JHV 10	9.79098	-15.5191
JHV 11	12.1685	-18.8167
JHV 12	10.5921	-16.0591
JHV 13
JHV 14	12.0076	-16.6063
JHV15	11.9241	-16.4249
RIB1	17.4338	-19.8359
RIB2	13.8758	-19.2145
RIB3	17.8194	-20.9437
RIB4	16.9466	-19.9704
RIB5	10.5622	-19.9183
RIB6	10.8998	-19.7921
RIB7	12.2004	-20.0512
RIB8	11.6488	-20.5402
RIB9	12.2386	-21.8927
RIB10	11.7045	-21.2683
RIB11	10.9416	-20.719
RIB12	11.2385	-20.4964
RIB13	12.0757	-20.5232
RIB14	12.6675	-20.095
RIB15	12.153	-20.652
RIB16	12.1793	-20.4315
RIB17	11.221	-20.7376
RIB18	12.9206	-20.415
RIB19	12.4463	-20.0095
RIB20	13.0428	-19.1815
